# Supplementary material
Source: Research Square preprint supplement (doi:10.21203/rs.3.rs-9578631/v1)
Supplement: Supplementary file 1 [file 79d34c85ddaa8d2f431abf7e.docx]

**Supplementary Material**

**Table S1**. Growth of Amazonian Dark Earth isolates after 7 days of incubation in the control R2A medium (left), R2A supplemented with Mars regolith, and regolith-only medium.

| **Strain code** | **Taxonomy** |
| --- | --- |
| TP3 | *Bacillus thuringiensis*  *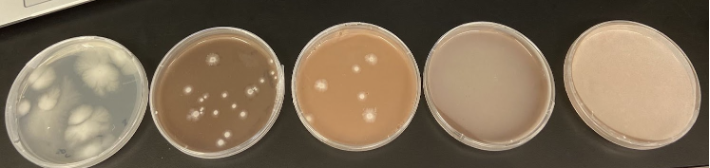* |
| TP7 | *Staphylococcus epidermidis*  *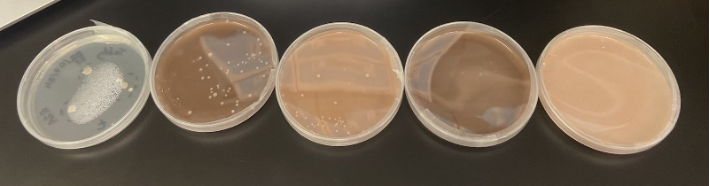* |
| TP15a | *Lysinibacillus xylanilyticus*  *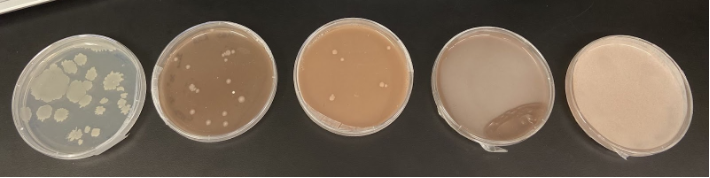* |
| TP16 | *Bacillus pseudomycoides*  *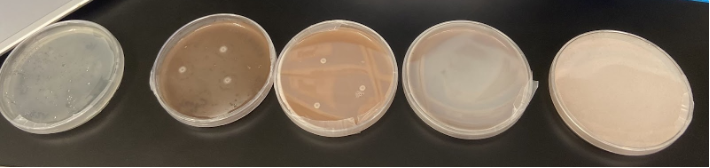* |
| TP20 | *Bacillus rhizoplanae*  *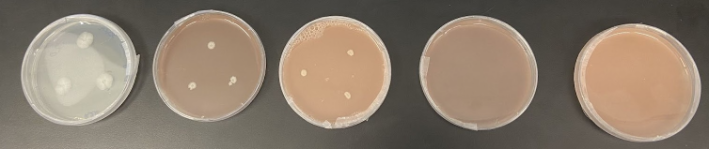* |
| TP35 | *Bacillus sp.*  *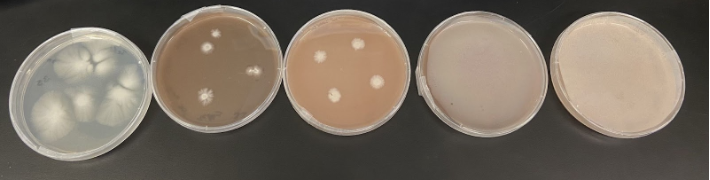* |
| TP37 | *Streptomyces cinnamoneus*  *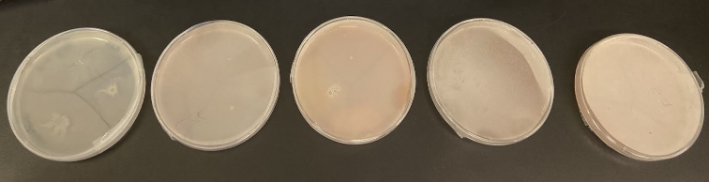* |
| TP47b | *Cohnella laeviribosi*  *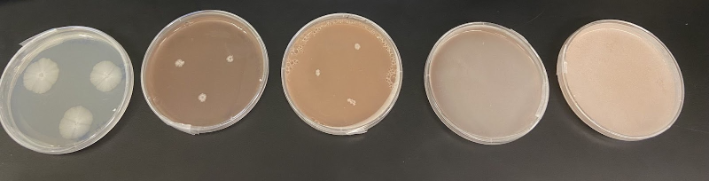* |
| TP91 | *Brevibacillus thermoruber*  *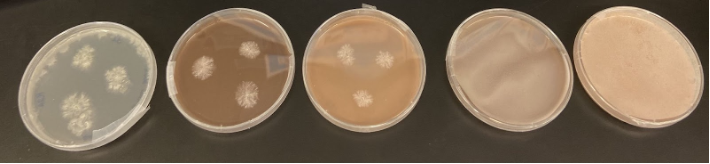* |
| TP122 | *Saccharococcus thermophilus*  *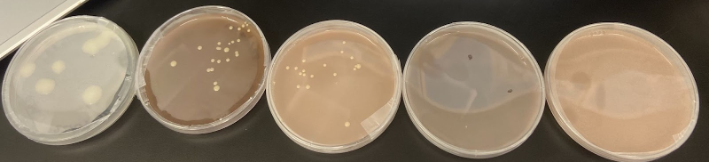* |
| TP153 | *Burkholderia lata*  *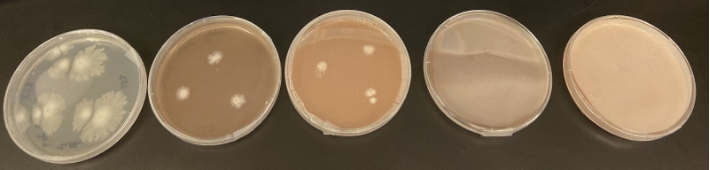* |
| TP154 | *Bacillus thuringiensis*  *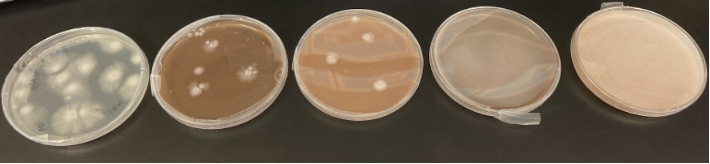* |
| TP159 | *Pseudomonas citronellolis*  *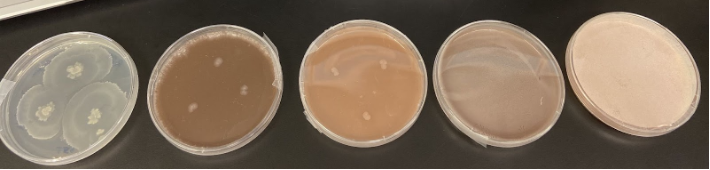* |

**Table S2.** Growth of Amazonian Dark Earth microorganisms in Mars regoliths (measured colony size in centimetres).

| **Isolate code** | **Taxonomy** | **Control** | **R2A MGS** | **R2A JEZ-1** | **MGS-only** | **JEZ-1-only** |
| --- | --- | --- | --- | --- | --- | --- |
| TP3 | *Bacillus thuringiensis* | 1.5‒2.5 | 0.5‒0.8 | 0.7 | 0.3 | 0.2 |
| TP5 | *Fictibacillus rigui* | - | - | - | - | - |
| TP7 | *Staphylococcus sp.* | 0.4‒0.6 | 0.3‒0.4 | 0.3 | 0.2 | - |
| TP15a | *Lysinibacillus sp.* | 1‒3 | 0.5 | 0.4 | 0.3 | - |
| TP16 | *Bacillus pseudomycoides* | 2‒3 | 0.7 | 0.4‒0.5 | - | - |
| TP20 | *Bacillus rhizoplanae* | 1‒1.5 | 0.5 | 0.4 | - | - |
| TP35 | *Bacillus sp.* | 2‒3 | 0.7‒1 | 0.8 | 0.3 | 0.3 |
| TP37 | *Streptomyces sp.* | 3‒5 | 0.3‒0.4 | 0.4 | - | - |
| TP47b | *Cohnella laeviribosi* | 2 | 0.5 | 0.5 | 0.2 | - |
| TP59 | *Streptomyces sp.* | - | - | - | - | - |
| TP91 | *Brevibacillus thermoruber* | 2 | 1.5 | 1 | 0.3 | 0.1‒0.2 |
| TP122 | *Parageobacillus sp.* | 1.2‒1.5 | 0.4 | 0.3 | 0.2 | 0.2 |
| TP153 | *Burkholderia sp.* | 2‒3.5 | 0.7‒1 | 0.7 | 0.2 | 0.2 |
| TP154 | *Bacillus cereus* | 1.5‒2 | 0.5‒1 | 0.8 | 0.2 | 0.2 |
| TP159 | *Pseudomonas sp.* | 3.5‒5 | 0.5‒0.7 | 0.3‒0.4 | - | - |

-: no recorded growth


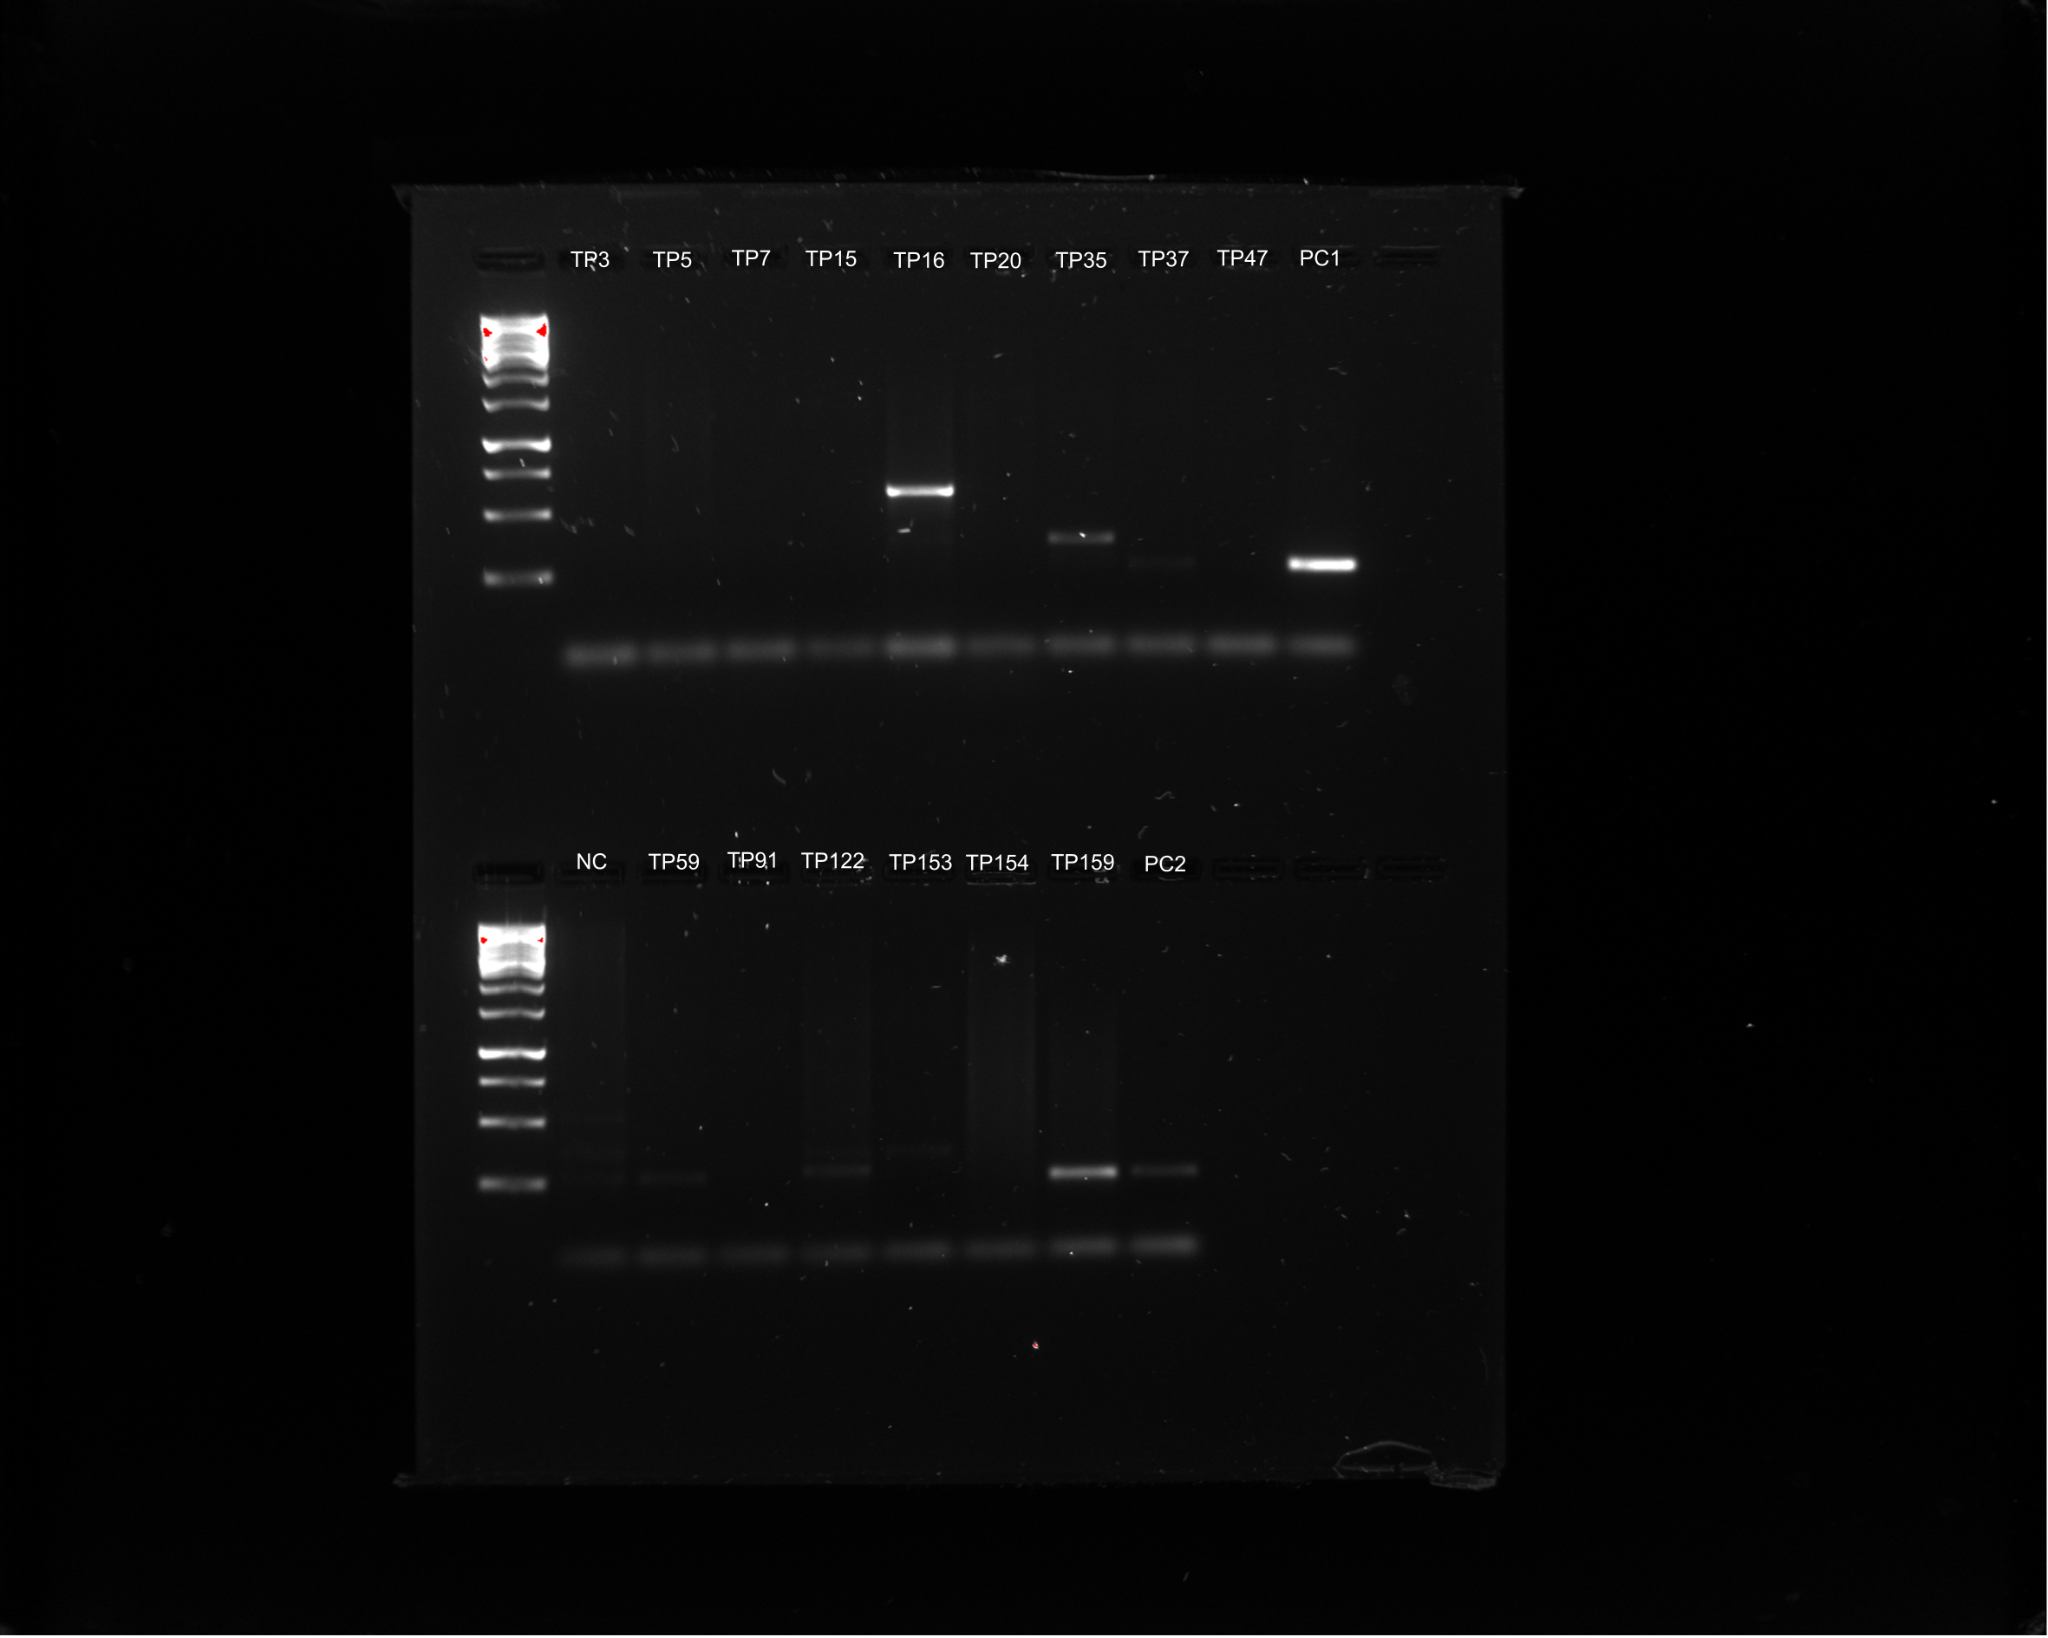


**Figure S1.** Agarose gel electrophoresis displaying PCR amplification products of the *nifH* gene from selected microbial isolates. Lane labels correspond to isolate IDs; molecular weight markers are shown in the first lane of each row. PC1 and PC2 denote positive controls, and NC indicates the negative control. Bands at the expected size confirm successful amplification of *nifH* in the corresponding isolates.
